# Supplementary material
Source: HighWire-hosted journal article supplement (https://bmjopen.bmj.com/content/13/11/e072276)
Supplement: inline-supplementary-material-1 [file inline-supplementary-material-1.pdf]

Supplementary Table 1 - Developing statements for the Delphi

## Theme One: Reasons related to the Person

| Findings from Focus Groups<br>(at a coding level)                                                                                                                                                                                                                                                                                                                                                                                                       | Findings from Literature                                                                                                                                                                                                                                                                                                                                                     | Proposed Delphi Statement                                                                                                                                                  |
|---------------------------------------------------------------------------------------------------------------------------------------------------------------------------------------------------------------------------------------------------------------------------------------------------------------------------------------------------------------------------------------------------------------------------------------------------------|------------------------------------------------------------------------------------------------------------------------------------------------------------------------------------------------------------------------------------------------------------------------------------------------------------------------------------------------------------------------------|----------------------------------------------------------------------------------------------------------------------------------------------------------------------------|
| <p><b>Medically unwell</b></p> <p><b>Blood pressure unstable</b></p> <p><b>Heart-rate unstable</b></p> <p><b>Too drowsy/not alert enough to participate</b></p> <p><b>If feeding has been established or not</b></p> <p><b>For palliative care</b></p> <p><b>Fatigue limits therapy</b></p> <p><b>Receiving 45 minutes of therapy can be limited by co-morbidities.</b></p> <p><b>Therapy sessions may be cut short as patient not feeling well</b></p> | <p>Clinical instability, concurrent medical illness and post-stroke fatigue could influence provision of therapy for a stroke survivor (Clarke 2018)</p> <p>Fatigue and medical complications can be barriers to rehabilitation. (Taylor 2015)</p> <p>Patient's health status influences physiotherapists' guideline adherence on intensity of practice (Ottermans 2012)</p> | <p>A Stroke survivor may not receive the recommended amount of therapy for medical reasons (such as unstable blood pressure, chest infection, nutritional status etc.)</p> |
| <p><b>Impaired attention can limit a stroke survivors' ability to tolerate therapy</b></p>                                                                                                                                                                                                                                                                                                                                                              | <p>Cognitive impairment can be a barrier to therapy intervention (Taylor 2015)</p>                                                                                                                                                                                                                                                                                           | <p>A therapy session may end if the stroke survivor is not able to</p>                                                                                                     |

|                                                                                                                                                                                                                                                                                                                                                                                                                                                                                                                                                                                               |                                                                                                                                                         |                                                                                                                                    |
|-----------------------------------------------------------------------------------------------------------------------------------------------------------------------------------------------------------------------------------------------------------------------------------------------------------------------------------------------------------------------------------------------------------------------------------------------------------------------------------------------------------------------------------------------------------------------------------------------|---------------------------------------------------------------------------------------------------------------------------------------------------------|------------------------------------------------------------------------------------------------------------------------------------|
| <p><b>A patient's impaired attention can limit their ability to tolerate therapy.</b></p>                                                                                                                                                                                                                                                                                                                                                                                                                                                                                                     |                                                                                                                                                         | <p>maintain appropriate attention to the therapy input</p>                                                                         |
| <p><b>Not all patients can tolerate 45 minutes of therapy</b></p> <p><b>Difficult to break down 45 minutes into smaller sessions for those who can't tolerate all in one go</b></p> <p><b>Stroke survivor may not receive 45 minutes of therapy because they are unable to tolerate therapy</b></p> <p><b>Patient fatigue demonstrates that they are not tolerating therapy</b></p> <p><b>The amount of therapy a patient gets depends on what they can tolerate.</b></p> <p><b>Some patients can't tolerate 45 minutes of therapy in a day, even if its broken into shorter sessions</b></p> | <p>Potentially, the reason why people didn't receive the recommended amount of therapy is because they were unable to tolerate therapy (Foley 2012)</p> | <p>A therapy session may end if the stroke survivor is not tolerating the therapy input</p>                                        |
| <p><b>Changing the amount of input that is given to someone who is 'not progressing'</b></p> <p><b>Speed at which someone is going to progress influencing decisions</b></p> <p><b>Objectively demonstrating that someone is not improving using Outcome Measures</b></p> <p><b>Patients who are making the most progress are prioritized for therapy</b></p>                                                                                                                                                                                                                                 | <p>People who are not making progress are considered to be a low priority for therapy after stroke (McGlinchey and Davenport 2015)</p>                  | <p>If a stroke survivor isn't making progress in therapy, they are unlikely to continue to receive 45 minutes of daily therapy</p> |

|                                                                                                                                                                                                                                                                         |                                                                                                                                                                                                                                      |                                                                                                                           |
|-------------------------------------------------------------------------------------------------------------------------------------------------------------------------------------------------------------------------------------------------------------------------|--------------------------------------------------------------------------------------------------------------------------------------------------------------------------------------------------------------------------------------|---------------------------------------------------------------------------------------------------------------------------|
| <b>Patient's level of dependence can indicate their appropriateness for therapy</b>                                                                                                                                                                                     | Functional level post-stroke can be an indicator of how much therapy someone received (Hakkennes 2011)                                                                                                                               | If a stroke survivor remains very dependent on care, they are unlikely to continue to receive 45 minutes of therapy daily |
| <b>Patients not receiving 45 minutes on the basis that they can self-manage</b><br><br><b>Patients not receiving the 45 minutes, because they can direct their own therapy</b><br><br><b>Do not receive 45 minutes of therapy if they can self-direct their therapy</b> | People who are able to perform exercises independently may be a lower priority for Physiotherapy after stroke (McGlinchey and Davenport 2015)                                                                                        | If a stroke survivor can exercise independently, they are unlikely to receive 45 minutes of therapy daily.                |
| <b>Some patients are more motivated for therapy than others</b><br><br><b>Patient's motivation can limit them receiving 45 minutes of therapy</b>                                                                                                                       | People who are motivated are more likely to be considered high priority for Physiotherapy (McGlinchey and Davenport 2015)<br><br>People who are motivated are considered most appropriate for intensive rehabilitation (Taylor 2015) | A Stroke survivor may not receive the recommended amount of therapy if they are not motivated for therapy                 |
| <b>Low mood can be a barrier to delivering the 45 minutes of therapy.</b>                                                                                                                                                                                               | Depressive symptoms effect participation in rehabilitation (Skidmore 2010)                                                                                                                                                           | A Stroke survivor may not receive the recommended amount of therapy if they are low in mood.                              |
| <b>Might not get it if patient declined.</b><br><br><b>Sometimes patients don't want daily therapy</b>                                                                                                                                                                  | If a person requests to stop physiotherapy then it will be stopped (McGlinchey and Davenport 2015)                                                                                                                                   | A Stroke survivor may not receive the recommended amount of therapy if they do not consent to therapy                     |

|                                                                                                                                                                                                                                                                                                                                                  |                                                                                         |                                                                                                                         |
|--------------------------------------------------------------------------------------------------------------------------------------------------------------------------------------------------------------------------------------------------------------------------------------------------------------------------------------------------|-----------------------------------------------------------------------------------------|-------------------------------------------------------------------------------------------------------------------------|
| <p><b>Lack of consent can be a barrier to delivering the 45 minutes of therapy.</b></p> <p><b>Patients may decide they don't want therapy</b></p> <p><b>Patient choice may determine whether or not they receive 45 minutes of therapy</b></p> <p><b>Patient might not have therapy if they do not consent (provided they have capacity)</b></p> |                                                                                         |                                                                                                                         |
| <p><b>Might not get it if patient has visitors</b></p> <p><b>Visitors may limit the ability to deliver 45 minutes of therapy</b></p> <p><b>Having visitors can mean that Stroke Survivors don't want to engage in therapy</b></p>                                                                                                                | <p><b>No related findings in literature</b></p>                                         | <p>A Stroke survivor may not receive the recommended amount of therapy if they have visitors</p>                        |
| <p><b>Need consistent participation from patient to continue</b></p>                                                                                                                                                                                                                                                                             | <p><b>No related findings in literature</b></p>                                         | <p>A stroke survivor may not be prioritised for daily therapy if they are not consistently participating in therapy</p> |
| <p><b>Not identified in focus groups</b></p>                                                                                                                                                                                                                                                                                                     | <p>Lack of English as a first language may limit rehabilitation input (Taylor 2015)</p> | <p>A stroke survivor may not receive 45 minutes of therapy if they speak little or no English</p>                       |
| <p><b>Not identified in focus groups</b></p>                                                                                                                                                                                                                                                                                                     | <p>Lack of social support may limit rehabilitation input (Taylor 2015)</p>              | <p>A Stroke survivor may not receive 45 minutes of therapy due to social</p>                                            |

|                                                                                                                                                                                                                                                                                        |                                                                                                                                                                                                                              |                                                                                                                                                                                     |
|----------------------------------------------------------------------------------------------------------------------------------------------------------------------------------------------------------------------------------------------------------------------------------------|------------------------------------------------------------------------------------------------------------------------------------------------------------------------------------------------------------------------------|-------------------------------------------------------------------------------------------------------------------------------------------------------------------------------------|
|                                                                                                                                                                                                                                                                                        | Presence of social support is associated with selection for rehabilitation (Hakkennes 2011)                                                                                                                                  | issues (such as lack of social support, addiction or social complexity)                                                                                                             |
| <b>If someone was fully dependent before (might not receive the guideline amount of therapy)</b>                                                                                                                                                                                       | Pre-stroke functional level is associated with selection for rehabilitation (Hakkennes 2011)                                                                                                                                 | If a stroke survivor was dependent on care before they had a stroke, they are less likely to continue to receive 45 minutes of therapy daily.                                       |
| <b>Some people might benefit from therapy, but it is not given to them, as they appear to be at 'baseline' and safe for discharge</b>                                                                                                                                                  | Post-stroke functional level is associated with selection for rehabilitation (Hakkennes 2011)<br><br>Those who are at baseline level of mobility/function are low priority for physiotherapy (McGlinchey and Davenport 2015) | If a stroke survivor has returned to their previous level of function, they are less likely to continue to receive 45 minutes of therapy daily.                                     |
| <b>Therapy sessions may be cut short as patient has made other plans</b><br><br><b>Being able to 'get to' patients may influence the amount of therapy they have</b>                                                                                                                   | <b>No related findings in literature</b>                                                                                                                                                                                     | A Stroke survivor may not receive 45 minutes of therapy if they have other priorities (such as an appointment or a wish to do something else at the time they are offered therapy). |
| <b>Patients may decide they don't want therapy because they want to be doing something else (stated specifically in relation to ESD).</b><br><br><b>A patient's own priorities will influence whether they receive 45 minutes of therapy (Stated specifically in relation to ESD).</b> | <b>No related findings in literature</b>                                                                                                                                                                                     | In the community, a Stroke survivor may not receive 45 minutes of therapy if they are prioritising 'getting on with their life'                                                     |

**Theme Two: The individual Therapist**

| Findings from Focus Groups<br>(at a coding level)                                                                                                                                                                                                                                                                                                     | Findings from Literature                                                                                                                                                                                                                                                                                                                                                                                                                               | Proposed Delphi Statement                                                                                          |
|-------------------------------------------------------------------------------------------------------------------------------------------------------------------------------------------------------------------------------------------------------------------------------------------------------------------------------------------------------|--------------------------------------------------------------------------------------------------------------------------------------------------------------------------------------------------------------------------------------------------------------------------------------------------------------------------------------------------------------------------------------------------------------------------------------------------------|--------------------------------------------------------------------------------------------------------------------|
| <p><b>Difficult to deliver 45 minutes of therapy when there is a lot of new patients</b></p> <p><b>New admissions can limit the ability to deliver 45 minutes of therapy</b></p> <p><b>Might not receive 45 minutes of therapy due to competing targets</b></p> <p><b>New patient assessments limits ability to provide 45 minutes of therapy</b></p> | <p>New patient assessments are high priority (more likely to receive therapy) (McGlinchey and Davenport 2015)</p>                                                                                                                                                                                                                                                                                                                                      | <p>A stroke survivor may not receive 45 minutes of therapy due to new patient assessments being prioritised</p>    |
| <p><b>Stroke rehabilitation sessions are the third priority (after admissions and discharges)</b></p>                                                                                                                                                                                                                                                 | <p>For those with a clear prognosis, therapists' focus was on facilitating discharge (Taylor 2015)</p> <p>Discharge planning takes up a large proportion of therapist time, particularly in socio-economically deprived areas (Taylor 2015)</p> <p>People who need a lot of support with discharge planning get less face-to-face therapy time (Taylor 2015)</p> <p>People who are approaching imminent discharge as high priority (more likely to</p> | <p>A stroke survivor may not receive 45 minutes of therapy due to patient discharges being seen as a priority.</p> |

|                                                                             |                                                                                                                                                                                                                                                                                                                                                                                                                                                                                                                 |                                                                                                                                                                                                               |
|-----------------------------------------------------------------------------|-----------------------------------------------------------------------------------------------------------------------------------------------------------------------------------------------------------------------------------------------------------------------------------------------------------------------------------------------------------------------------------------------------------------------------------------------------------------------------------------------------------------|---------------------------------------------------------------------------------------------------------------------------------------------------------------------------------------------------------------|
|                                                                             | <p>receive therapy) (McGlinchey and Davenport 2015)</p> <p>Discharge planning was prioritised over face-to-face therapy (Clarke 2018)</p> <p>Focus on discharge planning may detract from rehabilitation (Taylor 2018).</p>                                                                                                                                                                                                                                                                                     |                                                                                                                                                                                                               |
| <b>Size of caseload can determine ability to provide the recommendation</b> | Decisions regarding the frequency of therapy depend on time available (McGlinchey and Davenport 2015)                                                                                                                                                                                                                                                                                                                                                                                                           | A stroke survivor may not receive 45 minutes of therapy because of the size of the therapists' caseload.                                                                                                      |
| <b>Not identified in focus groups</b>                                       | <p>Non-clinical commitments (staff meetings, in-service training, ward handovers) reduce f2f therapy time (McGlinchey and Davenport 2015)</p> <p>Units that spend more time in information exchange deliver less rehabilitation to the people on their units. (Clarke 2018)</p> <p>Time spent in other non-patient contact activity (such as planning, documentation, ordering equipment/transport, developing training, staff supervision) effected the amount of therapy provided to people (Clarke 2018)</p> | <p>Non-patient contact activities (such as handover, MDT meetings, planning therapy sessions, ordering equipment and documentation) limit my ability to deliver 45 minutes of therapy to stroke survivors</p> |

|                                                                                                                                                                                                                                                                                                                                                                                                                                                                                                                                                                 |                                                                                                                                                                                                                                                                                                                              |                                                                                                                                           |
|-----------------------------------------------------------------------------------------------------------------------------------------------------------------------------------------------------------------------------------------------------------------------------------------------------------------------------------------------------------------------------------------------------------------------------------------------------------------------------------------------------------------------------------------------------------------|------------------------------------------------------------------------------------------------------------------------------------------------------------------------------------------------------------------------------------------------------------------------------------------------------------------------------|-------------------------------------------------------------------------------------------------------------------------------------------|
| <b>Not identified in the focus groups</b>                                                                                                                                                                                                                                                                                                                                                                                                                                                                                                                       | Therapists either are not aware of, or didn't discuss the evidence underpinning the recommendation for a minimum of 45 minutes of therapy, in relation to therapy delivery (Clarke 2018).<br><br>Therapists rely on their clinical experience when providing therapy, not research evidence (McGlinchey and Davenport 2015). | My knowledge and understanding of stroke recovery effects the decisions I make regarding amount of therapy I provide to stroke survivors. |
| <p><b>The need to ensure that resources are used appropriately</b></p> <p><b>Ensuring family understand about decisions made re: amount of therapy.</b></p> <p><b>Have to consider the best use of resources in the provision of therapy</b></p> <p><b>Objectively demonstrating that someone is not improving using Outcome Measures</b></p> <p><b>Prioritizing patients when there is a lack of resources</b></p> <p><b>Not providing people with more therapy for the sake of it</b></p> <p><b>Needing to manage (or potentially ration?) a resource</b></p> | <b>No related findings in literature</b>                                                                                                                                                                                                                                                                                     | It is important that I can justify the decisions I have made about the amount of therapy a stroke survivor receives.                      |
| <b>Doing the 'best thing for the patient'</b>                                                                                                                                                                                                                                                                                                                                                                                                                                                                                                                   | How much therapy delivered depends on the individual characteristics of both the person and the therapist (Taylor 2015)                                                                                                                                                                                                      | The therapy a stroke survivor receives should be based on what                                                                            |



|                                                                                                                                                                                                                                                                                                                                                                                                                                                                 |                                                                                                              |                                                                                                                                                 |
|-----------------------------------------------------------------------------------------------------------------------------------------------------------------------------------------------------------------------------------------------------------------------------------------------------------------------------------------------------------------------------------------------------------------------------------------------------------------|--------------------------------------------------------------------------------------------------------------|-------------------------------------------------------------------------------------------------------------------------------------------------|
| <p><b>The amount of therapy a patient gets is based on what they need.</b></p> <p><b>What the patient needs is more important than a fixed amount.</b></p> <p><b>Patient need is most important</b></p> <p><b>Importance of delivering what patients need, not what is outlined in guidance.</b></p> <p><b>Care needs to be individualized</b></p> <p><b>Therapy should be patient-focused</b></p> <p><b>Therapy is tailored, dependent on patient need</b></p> |                                                                                                              | <p>they need, not on a pre-specified amount.</p>                                                                                                |
| <p><b>Relatives expect therapy daily.</b></p> <p><b>Public may know about guidelines</b></p> <p><b>Patients/relatives' awareness of guideline</b></p> <p><b>Increases accountability to patients</b></p> <p><b>Potentially only accountable to some patients (those who are 'savvy' and have 'read up')</b></p> <p><b>Should be able to justify to patients/relatives why they are not receiving the guideline amount of therapy</b></p>                        | <p>Individuals/families that can 'work the system' may influence therapist decision-making (Taylor 2015)</p> | <p>If a relative and/or carer are aware of the guidance, then I am more likely to ensure the stroke survivor receives 45 minutes of therapy</p> |

|                                                                                                                                                                                                            |  |                                                                                                                                                      |
|------------------------------------------------------------------------------------------------------------------------------------------------------------------------------------------------------------|--|------------------------------------------------------------------------------------------------------------------------------------------------------|
|                                                                                                                                                                                                            |  |                                                                                                                                                      |
| <b>Not identified as a factor related to therapy deliver in either focus groups or research literature, but based on experience of working in stroke care, and following discussion with research team</b> |  | A stroke survivor may not receive 45 minutes of therapy because I am due to leave work and there isn't time.                                         |
| <b>Not identified as a factor related to therapy deliver in either focus groups or research literature, but based on experience of working in stroke care, and following discussion with research team</b> |  | A stroke survivor may not receive 45 minutes of therapy because I don't feel well, either mentally or physically.                                    |
| <b>Not identified as a factor related to therapy deliver in either focus groups or research literature, but based on experience of working in stroke care, and following discussion with research team</b> |  | How I am feeling (including my mood and physical comfort) influences the decisions I make regarding amount of therapy I provide to stroke survivors. |

## Theme Three: The Stroke MDT

| Findings from Focus Groups<br>(at a coding level)                                                                                                                                                                                                                                              | Findings from Literature                                                                                                                                                                                                                                                                                                  | Proposed Delphi Statement                                                                                                                               |
|------------------------------------------------------------------------------------------------------------------------------------------------------------------------------------------------------------------------------------------------------------------------------------------------|---------------------------------------------------------------------------------------------------------------------------------------------------------------------------------------------------------------------------------------------------------------------------------------------------------------------------|---------------------------------------------------------------------------------------------------------------------------------------------------------|
| <p><b>Investigations can limit the ability to deliver 45 minutes of therapy</b></p> <p><b>Stroke survivor may not receive 45 minutes of therapy if they have to be taken for investigations</b></p>                                                                                            | <p>Therapy input may be limited if patients are off the ward (Foley 2012)</p>                                                                                                                                                                                                                                             | <p>A stroke survivor may not receive 45 minutes of therapy if they need to go for a medical investigation.</p>                                          |
| <p><b>Competing professionals can limit the ability to deliver 45 minutes of therapy</b></p> <p><b>Amount of therapy input can be dependent on the other therapy that the stroke survivor is also receiving</b></p>                                                                            | <p>Not specifically identified in the literature, although could relate to people 'not being ready' for therapy – as below.</p>                                                                                                                                                                                           | <p>A stroke survivor may not receive 45 minutes of therapy if they are seeing another healthcare professional at the time of their therapy session.</p> |
| <p><b>Therapy sessions may not start on time due to people needing their medications.</b></p> <p><b>Limited by sessions not starting on time/patients not being ready for therapy.</b></p> <p><b>Therapy sessions may not start on time due to people's NG tubes still being attached.</b></p> | <p>There can be issues with people not being ready for therapy sessions (Taylor 2015)</p> <p>Patients not being ready for therapy influenced the amount of therapy delivered (McGlinchey and Davenport 2015)</p> <p>Achieving the 45 minute guideline was limited by people not being ready for therapy (Clarke 2018)</p> | <p>A stroke survivor may not receive 45 minutes of therapy if they are receiving other healthcare input, such as medication or artificial feeding.</p>  |

|                                                                                                                                           |                                                                                                                                                                                                                   |                                                                                                                                                                                |
|-------------------------------------------------------------------------------------------------------------------------------------------|-------------------------------------------------------------------------------------------------------------------------------------------------------------------------------------------------------------------|--------------------------------------------------------------------------------------------------------------------------------------------------------------------------------|
| <b>Therapists are collectively focused on delivering 45minute guideline</b><br><br><b>Regular, MDT meetings to discuss the guidelines</b> | Therapists discuss daily which people were and were not appropriate for the guideline 45 minute guideline (Taylor 2018).<br><br>Teamwork is required to facilitate joined-up working across the MDT (Taylor 2015) | Other members of the MDT (including other therapists of a different profession to me) influence the decisions I make regarding amount of therapy I provide to stroke survivors |
| <b>Therapists are collectively focused on delivering 45minute guideline</b>                                                               | Therapists discuss daily which people were and were not appropriate for the guideline 45 minute guideline (Taylor 2018).<br><br>Teamwork is required to facilitate joined-up working across the MDT (Taylor 2015) | Therapists of the same profession to me influence the decisions I make regarding amount of therapy I provide to stroke survivors.                                              |

## Theme Four: The Organisation

| Findings from Focus Groups<br>(at a coding level)                                                                                                                                                                                                                                                                                                                           | Findings from Literature                      | Proposed Delphi Statement                                                                                                                                    |
|-----------------------------------------------------------------------------------------------------------------------------------------------------------------------------------------------------------------------------------------------------------------------------------------------------------------------------------------------------------------------------|-----------------------------------------------|--------------------------------------------------------------------------------------------------------------------------------------------------------------|
| <p><b>Lack of flexibility within the working day may be one reason why someone might not receive 45minutes of therapy - if they 'miss their slot'</b></p> <p><b>Fast pace in acute stroke</b></p> <p><b>Interruptions to therapy sessions occur due to the nature of acute hospital work</b></p> <p><b>Amount of therapy limited by the nature of service provision</b></p> | <p><b>Nothing found in the literature</b></p> | <p>Stroke survivors may not receive the recommended minimum of 45 minutes of therapy in the acute setting, due to the fast-paced nature of the service.</p>  |
| <p><b>Resources can impact the provision of 45minutes of therapy</b></p> <p><b>Size of caseload can determine ability to provide the recommendation</b></p>                                                                                                                                                                                                                 | <p><b>?Clarke 2018 and Taylor 2018</b></p>    | <p>Stroke survivors may not receive 45 minutes of therapy in the acute setting, due the caseload being very large at times.</p>                              |
| <p><b>In the community, it is unusual for a patient to have more than 45 minutes of therapy-a-day – even if they have more than one therapy involved</b></p> <p><b>Use of combined OT/PT sessions, even when sometimes might benefit from separate. (in the community)</b></p> <p><b>Harder to achieve 45 minutes as part of ESD</b></p>                                    | <p><b>Nothing found in the literature</b></p> | <p>Stroke survivors receiving Early Supported Discharge (ESD) input are unlikely to receive more than one session of therapy-a-day when they are at home</p> |

|                                                                                                                                                                                                                                                                                                                                                                                                                                                                                                                                                                                                                              |                                               |                                                                                                                        |
|------------------------------------------------------------------------------------------------------------------------------------------------------------------------------------------------------------------------------------------------------------------------------------------------------------------------------------------------------------------------------------------------------------------------------------------------------------------------------------------------------------------------------------------------------------------------------------------------------------------------------|-----------------------------------------------|------------------------------------------------------------------------------------------------------------------------|
| <p><b>People don't want as much therapy at home (ESD).</b></p> <p><b>Patients lack time for therapy at home</b></p> <p><b>Stroke Survivors may want less therapy in order to "get back to normal life"</b></p>                                                                                                                                                                                                                                                                                                                                                                                                               | <p><b>Nothing found in the literature</b></p> | <p>Stroke survivors receiving ESD input don't want more than one session of therapy-a-day when they are at home</p>    |
| <p><b>Amount of therapy limited by the nature of service provision (ESD service limited to 6 week duration)</b></p>                                                                                                                                                                                                                                                                                                                                                                                                                                                                                                          | <p><b>Nothing found in the literature</b></p> | <p>Stroke survivors continue to receive therapy for as long as they would benefit from it, within the ESD setting.</p> |
| <p><b>Not always the same discipline for 45minutes (in ESD).</b></p> <p><b>People don't want as much therapy at home (ESD).</b></p> <p><b>Patients lack time for therapy at home</b></p> <p><b>Stroke Survivors may want less therapy in order to "get back to normal life"</b></p> <p><b>Harder to achieve 45 minutes as part of ESD</b></p> <p><b>In the community, it is unusual for a patient to have more than 45 minutes of therapy-a-day – even if they have more than one therapy involved</b></p> <p><b>Use of combined OT/PT sessions, even when sometimes might benefit from separate. (in the community)</b></p> | <p><b>Nothing found in the literature</b></p> | <p>The guideline for 45 minutes of therapy is not appropriate for stroke survivors receiving ESD.</p>                  |

|                                                                                                                                                                                                                                                                                                                                                                                                                                                              |                                                                                                                                                                                                                                                                                                                                                                                                                                                                                                        |                                                                                                                                                                      |
|--------------------------------------------------------------------------------------------------------------------------------------------------------------------------------------------------------------------------------------------------------------------------------------------------------------------------------------------------------------------------------------------------------------------------------------------------------------|--------------------------------------------------------------------------------------------------------------------------------------------------------------------------------------------------------------------------------------------------------------------------------------------------------------------------------------------------------------------------------------------------------------------------------------------------------------------------------------------------------|----------------------------------------------------------------------------------------------------------------------------------------------------------------------|
| <p><b>Resources can impact the provision of 45minutes of therapy</b></p> <p><b>Stroke survivor may not receive 45 minutes of therapy due to staffing levels</b></p> <p><b>Might not receive 45 minutes of therapy due to issues with staffing.</b></p> <p><b>Staffing levels influence the amount of therapy that patients receive.</b></p> <p><b>Highlighting staffing issues.</b></p>                                                                      | <p>Staff are not replaced when they are off sick/in meetings/in training and this impacts the provision of therapy (Foley 2012)</p> <p>Lack of staff availability can make it difficult to deliver therapy (McGlinchey and Davenport 2015)</p> <p>Higher levels of staffing are linked with greater achievement of the 45 minute guideline (Clarke 2018)</p> <p>Sometimes, therapists' make decisions around about a person's suitability for therapy based in resource availability (Taylor 2018)</p> | <p>Lack of therapy staff, can be a reason why a stroke survivor does not receive the 45 minute guideline</p>                                                         |
| <p><b>Lack of flexibility within the working day may be one reason why someone might not receive 45minutes of therapy - if they 'miss their slot'</b></p> <p><b>Difficult to break down 45 minutes into smaller sessions for those who can't tolerate all in one go</b></p> <p><b>Difficult to achieve a schedule that is not 45 minutes in a block</b></p> <p><b>Efforts may be made to go back to fatigued patients, but it depends on the patient</b></p> | <p>Therapists rarely returned to stroke survivors later in the same day to increase their 'dose' of therapy (Clarke 2018)</p>                                                                                                                                                                                                                                                                                                                                                                          | <p>Logistically, it is difficult to return to a stroke survivor for a second time in a day, if they are unable to tolerate 45 minutes of therapy in one session.</p> |

|                                                                                                                                                                                                                                                                                                                                            |                                                                                                                                                                                                                                                                                                                                                                                                                                                                                                                                                                                |                                                                                                                                  |
|--------------------------------------------------------------------------------------------------------------------------------------------------------------------------------------------------------------------------------------------------------------------------------------------------------------------------------------------|--------------------------------------------------------------------------------------------------------------------------------------------------------------------------------------------------------------------------------------------------------------------------------------------------------------------------------------------------------------------------------------------------------------------------------------------------------------------------------------------------------------------------------------------------------------------------------|----------------------------------------------------------------------------------------------------------------------------------|
| <p><b>Therapy can be broken up over the day to enable stroke survivors to have more therapy.</b></p> <p><b>Difficulty being flexible with patient sessions due to planning</b></p> <p><b>Book in more sessions-a-day if patient's tolerance is low.</b></p> <p><b>Some people benefit more from shorter, more 'intensive' sessions</b></p> |                                                                                                                                                                                                                                                                                                                                                                                                                                                                                                                                                                                |                                                                                                                                  |
| <p><b>Non-achievement of guidelines gains management attention</b></p> <p><b>Not achieving national target perceived as failure.</b></p> <p><b>Importance of getting a good SSNAP score</b></p> <p><b>SSNAP increases accountability/scrutiny</b></p>                                                                                      | <p>There is a belief that SSNAP scores influence service-commissioning decisions (Taylor 2018)</p> <p>Potentially, the SSNAP audit encourages commissioner-centred care, as opposed to patient-centred care (Taylor 2018).</p> <p>Achievement of the guideline is of great concern to senior therapists and therapy managers due to the real or perceived scrutiny from hospital managers and commissioners (Clarke 2018)</p> <p>Therapists may be concerned regarding how the achievement of the 45 minute guideline effects future commissioning decisions (Taylor 2018)</p> | <p>The achievement of a good SSNAP score for my organisation influences the amount of therapy I provide to stroke survivors.</p> |



|                                                                                                                        |                                                                                                                                                                                                                                                                                                                                                                       |                                                                                                               |
|------------------------------------------------------------------------------------------------------------------------|-----------------------------------------------------------------------------------------------------------------------------------------------------------------------------------------------------------------------------------------------------------------------------------------------------------------------------------------------------------------------|---------------------------------------------------------------------------------------------------------------|
|                                                                                                                        |                                                                                                                                                                                                                                                                                                                                                                       |                                                                                                               |
| <p><b>Judgment from managers/ managers judge what you are doing</b></p> <p><b>Guidelines perceived as a target</b></p> | <p>There is a belief that SSNAP scores influence service-commissioning decisions (Taylor 2018)</p> <p>Potentially, the SSNAP audit encourages commissioner-centred care, as opposed to patient-centred care (Taylor 2018).</p> <p>Achievement of the guideline dominates the thinking of those who account for the SSNAP performance ratings (Clarke et al. 2018)</p> | <p>I feel pressure to achieve a minimum of 45 minutes of therapy for all stroke survivors on my caseload.</p> |

#### Theme Five: The Guideline and it's measurement

| Findings from Focus Groups<br>(at a coding level)                                                                                                                                                                                                          | Findings from Literature                                                                         | Proposed Delphi Statement                                                                                      |
|------------------------------------------------------------------------------------------------------------------------------------------------------------------------------------------------------------------------------------------------------------|--------------------------------------------------------------------------------------------------|----------------------------------------------------------------------------------------------------------------|
| <p><b>The guideline gives a sense of obligation to provide a certain amount of therapy</b></p> <p><b>The 45 minute guidance has given a target to aim for</b></p> <p><b>Everyone should have 45 minutes of therapy unless there is a reason not to</b></p> | <p>SSNAP (measuring the achievement of the 45 minute guideline) shapes therapy (Clarke 2018)</p> | <p>The presence of the 45 minute guideline influences the amount of therapy I provide to stroke survivors.</p> |

|                                                                                                                                                                                                                                                                                                                                      |                                                                                                                                                                                                                              |                                                                                                                                         |
|--------------------------------------------------------------------------------------------------------------------------------------------------------------------------------------------------------------------------------------------------------------------------------------------------------------------------------------|------------------------------------------------------------------------------------------------------------------------------------------------------------------------------------------------------------------------------|-----------------------------------------------------------------------------------------------------------------------------------------|
| <p><b>Potentially the 45 minute guideline disadvantages some people, who would benefit from more than 45minutes of therapy</b></p> <p><b>The 45 minute guideline supports decision making</b></p>                                                                                                                                    |                                                                                                                                                                                                                              |                                                                                                                                         |
| <p><b>Pressure to deliver 45 minutes daily, even if the therapist feels it may not be the right thing for the patient.</b></p>                                                                                                                                                                                                       | <p>Therapists feel a conflict between their clinical judgement that the person can't tolerate a longer session and the 45 minute recommendation and the implications this would have for their SSNAP score (Clarke 2018)</p> | <p>I feel pressure to provide all stroke survivors with a minimum of 45 minutes of therapy, even if it is not clinically indicated.</p> |
| <p><b>More than 45 minutes of therapy is needed by some patients</b></p> <p><b>People should have more than 45 minutes if it will benefit them, they can tolerate it and they consent to it.</b></p> <p><b>Therapy sessions are not limited to 45 minutes.</b></p> <p><b>Generally, patients get the right amount of therapy</b></p> | <p><b>Nothing found in the literature</b></p>                                                                                                                                                                                | <p>Stroke survivors who would benefit from more than 45 minutes of therapy-per-day, generally receive it.</p>                           |
| <p><b>Uncertainty surrounding how patients will feel about 45 minutes of therapy 7 days-a week</b></p> <p><b>Potentially patients don't want therapy at the weekend.</b></p> <p><b>Potentially patients don't want therapy on Sundays</b></p>                                                                                        | <p><b>Nothing found in the literature</b></p>                                                                                                                                                                                | <p>Providing 45 minutes of therapy seven days a week is not appropriate for the majority of stroke survivors.</p>                       |

|                                                                                                                                                                                                                                                                                                                                                                                                                                                                                                      |                                                                                                                                  |                                                                                                                                      |
|------------------------------------------------------------------------------------------------------------------------------------------------------------------------------------------------------------------------------------------------------------------------------------------------------------------------------------------------------------------------------------------------------------------------------------------------------------------------------------------------------|----------------------------------------------------------------------------------------------------------------------------------|--------------------------------------------------------------------------------------------------------------------------------------|
| <p><b>7-day therapy might not reflect ‘real life’</b></p> <p><b>7-day therapy means that patients have no rest</b></p> <p><b>Therapy encroaching on ‘family time’ at weekends.</b></p> <p><b>Not necessarily therapy at the weekend that is an issue, more therapy seven days-a-week.</b></p> <p><b>Inpatients may be less likely to mind what day-of-the week it is.</b></p> <p><b>Some patients can’t tolerate therapy 7 days-a-week</b></p> <p><b>Patients may need a break from therapy.</b></p> |                                                                                                                                  |                                                                                                                                      |
| <p><b>SSNAP recording finishes once ‘active’ therapy is complete</b></p>                                                                                                                                                                                                                                                                                                                                                                                                                             | <p>SSNAP data is no longer recorded when someone is no longer receiving therapy (Taylor 2018)</p>                                | <p>If a stroke survivor is not appropriate for 45 minutes of therapy-per-day, then they will be discharged from therapy on SSNAP</p> |
| <p><b>SSNAP recording finishes once ‘active’ therapy is complete</b></p>                                                                                                                                                                                                                                                                                                                                                                                                                             | <p>Some therapists on some stroke units record ‘maintenance’ therapy whilst awaiting discharge and some do not (Clarke 2018)</p> | <p>If a stroke survivor is discharged from therapy on SSNAP, then they won’t receive 45 minutes of daily therapy</p>                 |
| <p><b>Prioritizing patients when there is a lack of resources</b></p> <p><b>What is the best alternative if unable to meet 45 minutes/day?</b></p>                                                                                                                                                                                                                                                                                                                                                   | <p><b>Nothing found in the literature</b></p>                                                                                    | <p>When I am unable to provide a minimum of 45 minutes of daily therapy, the best alternative is to</p>                              |

|                                                                                                                                                                                                                                 |                                        |                                                                                                                                               |
|---------------------------------------------------------------------------------------------------------------------------------------------------------------------------------------------------------------------------------|----------------------------------------|-----------------------------------------------------------------------------------------------------------------------------------------------|
| <b>Choose to provide more people with less therapy, daily, when unable to provide the recommendation</b>                                                                                                                        |                                        | provide daily therapy at a lesser number of minutes.                                                                                          |
| <b>Prioritizing patients when there is a lack of resources</b><br><br><b>What is the best alternative if unable to meet 45 minutes/day?</b><br><br><b>Better to spend more time with fewer patients (difference of opinion)</b> | <b>Nothing found in the literature</b> | When I am unable to provide a minimum of 45 minutes of daily therapy, the best alternative is to provide 45 minutes of therapy on fewer days. |
