# Supplementary material
Source: HighWire-hosted journal article supplement (https://bmjopen.bmj.com/content/13/11/e072276)
Supplement: inline-supplementary-material-2 [file inline-supplementary-material-2.pdf]

Supplementary Table 2 – Statements where consensus was not reached

| Concept                                                | Delphi round | Statement                                                                                                                                                                                                         | Result                                                 | Reason removed                                    |
|--------------------------------------------------------|--------------|-------------------------------------------------------------------------------------------------------------------------------------------------------------------------------------------------------------------|--------------------------------------------------------|---------------------------------------------------|
| <b>1. The effect of social Issues in the community</b> | 1            | A Stroke survivor may not receive 45 minutes of therapy due to social issues (such as lack of social support, addiction or social complexity)                                                                     | Disagree – 70.6%<br>Ambiguous – 14.7%<br>Agree – 14.7% | Unable to gain consensus                          |
|                                                        | 2            | In a community setting, a Stroke survivor may not receive 45 minutes of therapy due to social issues (such as lack of social support, addiction or social complexity)                                             | Disagree – 50%<br>Ambiguous – 25%<br>Agree – 25%       |                                                   |
| <b>2. Dependence on care prior to stroke</b>           | 1            | If a stroke survivor was dependent on care before they had a stroke, they are less likely to continue to receive 45 minutes of therapy daily                                                                      | Disagree – 55.9%<br>Ambiguous – 32.4%<br>Agree – 11.8% | Unable to gain consensus                          |
|                                                        | 2            | If a stroke survivor was <i>fully</i> dependent on care before they had a stroke, they are less likely to continue to receive 45 minutes of therapy daily                                                         | Disagree – 37.9%<br>Ambiguous – 27.6%<br>Agree – 34.5% |                                                   |
| <b>3. Engagement in therapy</b>                        | 2            | If a stroke survivor is not engaging with therapy (possibly because they lack insight into their impairments and/or are not accepting of their need for therapy) then they may not receive 45 minutes of therapy. | Disagree – 37.9%<br>Ambiguous – 41.4%<br>Agree – 20.7% | Considered too like statement about participation |
| <b>4. Effect of low mood</b>                           | 1            | A Stroke survivor may not receive the recommended amount of therapy if they are low in mood.                                                                                                                      | Disagree – 23.5%<br>Ambiguous – 47.1%<br>Agree – 29.4% | Unable to gain consensus                          |
|                                                        | 2            | If a stroke survivor's low mood is limiting their therapy engagement, despite efforts and intervention to address it, then they may not receive 45 minutes of daily therapy                                       | Disagree – 10.3%<br>Ambiguous – 31%<br>Agree – 58.6%   |                                                   |

| Concept                                              | Delphi round | Statement                                                                                                                                                                                                                     | Result                                                 | Reason removed           |
|------------------------------------------------------|--------------|-------------------------------------------------------------------------------------------------------------------------------------------------------------------------------------------------------------------------------|--------------------------------------------------------|--------------------------|
|                                                      | 3            | A stroke survivor may not receive a full 45 minutes of daily therapy if their low mood limits their engagement, despite amendments to their therapy                                                                           | Disagree – 3.9%<br>Ambiguous – 26.9%<br>Agree – 69.2%  |                          |
| <b>5. Presence of visitors</b>                       | 1            | A Stroke survivor may not receive the recommended amount of therapy if they have visitors                                                                                                                                     | Disagree – 41.2%<br>Ambiguous – 44.1%<br>Agree – 14.7% | Unable to gain consensus |
|                                                      | 2            | A stroke survivor who declines therapy in preference to spending time with their visitors may not receive 45 minutes of daily therapy                                                                                         | Disagree – 13.8%<br>Ambiguous – 31%<br>Agree – 55.2%   |                          |
|                                                      | 3            | A stroke survivor who declines therapy in preference to spending time with their visitors (despite the importance being explained to them) may not receive 45 minutes of daily therapy                                        | Disagree – 3.9%<br>Ambiguous – 23.1%<br>Agree – 73.1%  |                          |
| <b>6. Person with stroke having other priorities</b> | 1            | A Stroke survivor may not receive 45 minutes of therapy if they have other priorities (such as an appointment or a wish to do something else at the time they are offered therapy).                                           | Disagree – 8.8%<br>Ambiguous – 29.4%<br>Agree – 61.8%  | Unable to gain consensus |
|                                                      | 2            | A Stroke survivor may not receive 45 minutes of therapy if they express a lack of interest in therapy in preference to other activities (such as a non-medical appointment or a wish to do something else)                    | Disagree – 20.7%<br>Ambiguous – 31%<br>Agree – 48.3%   |                          |
|                                                      | 3            | A Stroke survivor may not receive 45 minutes of therapy if they prioritise other activities, such as non-medical appointments or simply wish to do something else (despite the importance of therapy being explained to them) | Disagree – 7.7%<br>Ambiguous – 23.1%<br>Agree – 69.2%  |                          |
| <b>7. The person with stroke's anxiety</b>           | 2            | Their own anxiety is a reason why a stroke survivor may not tolerate 45 minutes of therapy                                                                                                                                    | Disagree – 10.3%<br>Ambiguous – 44.8%<br>Agree – 44.8% | Unable to gain consensus |

| Concept                                 | Delphi round | Statement                                                                                                                                                                      | Result                                                 | Reason removed                           |
|-----------------------------------------|--------------|--------------------------------------------------------------------------------------------------------------------------------------------------------------------------------|--------------------------------------------------------|------------------------------------------|
|                                         | 3            | If a stroke survivor is anxious and strategies to manage their anxiety are not effective, then they may not receive 45 minutes of therapy                                      | Disagree – 3.9%<br>Ambiguous – 61.5%<br>Agree – 34.6%  |                                          |
| <b>8. Behavioural issues</b>            | 2            | If a stroke survivor has behavioural issues that impact engagement then they may not receive 45 minutes of therapy                                                             | Disagree – 10.3%<br>Ambiguous – 31%<br>Agree – 58.6%   | Unable to gain consensus                 |
|                                         | 3            | If a stroke survivor has behavioural issues that impact engagement, which cannot effectively be managed, then they may not receive 45 minutes of therapy                       | Disagree - 0%<br>Ambiguous – 38.5%<br>Agree – 61.5%    |                                          |
| <b>9. Cognitive impairment</b>          | 2            | If a stroke survivor has cognitive impairment (either new or pre-stroke) that that impacts engagement then they may not receive 45 minutes of therapy                          | Disagree – 24.1%<br>Ambiguous – 41.4%<br>Agree – 34.5% | Unable to gain consensus                 |
|                                         | 3            | If a stroke survivor has <i>severe</i> cognitive impairment (either new or pre-stroke) which impacts their engagement then they may not receive the full 45 minutes of therapy | Disagree - 11.5%<br>Ambiguous – 38.5%<br>Agree – 50%   |                                          |
| <b>10. The person identifying goals</b> | 2            | If the stroke survivor cannot identify achievable, meaningful goals, then they will not receive 45 minutes of therapy                                                          | Disagree – 65.6%<br>Ambiguous – 10.3%<br>Agree – 24.1% | Unable to gain consensus                 |
|                                         | 3            | If the stroke survivor does not independently identify any goals they will not receive 45 minutes of therapy                                                                   | Disagree - 73.1%<br>Ambiguous – 15.4%<br>Agree – 11.5% |                                          |
| <b>11. Therapist due to leave work</b>  | 1            | A stroke survivor may not receive 45 minutes of therapy because I am due to leave work and there isn't time                                                                    | Disagree – 40%<br>Ambiguous – 25.7%<br>Agree – 34.3%   | Too similar to caseload issue            |
| <b>12. Therapists is unwell</b>         | 1            | A stroke survivor may not receive 45 minutes of therapy because I don't feel well, either mentally or physically                                                               | Disagree – 71.4%<br>Ambiguous – 25.7%<br>Agree – 2.9%  | Considered to be an organisational issue |

| Concept                                                | Delphi round | Statement                                                                                                                                                                                         | Result                                                 | Reason removed                                       |
|--------------------------------------------------------|--------------|---------------------------------------------------------------------------------------------------------------------------------------------------------------------------------------------------|--------------------------------------------------------|------------------------------------------------------|
| <b>13. Therapist's non-clinical commitments</b>        | 2            | Non-clinical commitments (such as managerial responsibility or the education/supervision of others) impact the ability of therapists to deliver 45 minutes of therapy to their caseload.          | Disagree – 7.1%<br>Ambiguous – 35.7%<br>Agree – 57.1%  | Unable to gain consensus                             |
|                                                        | 3            | Non-clinical commitments (such as managerial responsibility or the education/supervision of others) sometimes impact the ability of therapists to deliver 45 minutes of therapy to their caseload | Disagree - 0%<br>Ambiguous – 30.8%<br>Agree – 69.2%    |                                                      |
| <b>14. Therapist identifying goals</b>                 | 2            | If I, as the therapist, cannot identify achievable, meaningful goals, then the stroke survivor will not receive 45 minutes of therapy                                                             | Disagree – 42.9%<br>Ambiguous – 39.3%<br>Agree – 17.9% | Unable to gain consensus                             |
|                                                        | 3            | If I am unable to identify any goals for the stroke survivor, they may not receive 45 minutes of therapy                                                                                          | Disagree - 23.1%<br>Ambiguous – 26.9%<br>Agree – 50%   |                                                      |
| <b>15. Meaningful/achievable Goals</b>                 | 3            | If neither I, as the therapist, nor the stroke survivor can identify any meaningful, achievable goals, then they will not receive 45 minutes of therapy                                           | Disagree - 7.7%<br>Ambiguous – 23.1%<br>Agree – 69.2%  | Unable to gain consensus                             |
| <b>16. The person receiving other healthcare input</b> | 1            | A stroke survivor may not receive 45 minutes of therapy if they are receiving other healthcare input, such as medication or artificial feeding                                                    | Disagree – 51.4%<br>Ambiguous – 34.3%<br>Agree – 14.3% | Unable to gain consensus                             |
|                                                        | 2            | A stroke survivor may not receive 45 minutes of therapy if they are not ready for therapy (e.g. not dressed, eating a meal, in the toilet, receiving medication, receiving artificial feeding)    | Disagree – 17.9%<br>Ambiguous – 57.1%<br>Agree – 25%   |                                                      |
| <b>17. Decision-making with other therapists (1)</b>   | 1            | Other members of the MDT (including other therapists of a different profession to me) influence the decisions I make regarding amount of therapy I provide to stroke survivors                    | Disagree – 31.4%<br>Ambiguous – 45.7%<br>Agree – 22.9% | Combined with statement below, as considered similar |

| Concept                                                                           | Delphi round | Statement                                                                                                                                                                                                      | Result                                                 | Reason removed           |
|-----------------------------------------------------------------------------------|--------------|----------------------------------------------------------------------------------------------------------------------------------------------------------------------------------------------------------------|--------------------------------------------------------|--------------------------|
| <b>18. Decision-making with other therapists (2)</b>                              | 1            | Therapists of the same profession to me influence the decisions I make regarding amount of therapy I provide to stroke survivors                                                                               | Disagree – 11.4%<br>Ambiguous – 48.6%<br>Agree – 40%   | Unable to gain consensus |
|                                                                                   | 2            | Decisions about the amount of therapy that a stroke survivor receives are discussed amongst the therapy team and are sometimes made jointly                                                                    | Disagree – 10.7%<br>Ambiguous – 17.9%<br>Agree – 71.4% |                          |
| <b>19. If another HCP is seeing the person at the time of the therapy session</b> | 1            | A stroke survivor may not receive 45 minutes of therapy if they are seeing another healthcare professional at the time of their therapy session                                                                | Disagree – 17.1%<br>Ambiguous – 42.9%<br>Agree – 40%   | Unable to gain consensus |
|                                                                                   | 2            | In the hyperacute/acute setting, a stroke survivor may not receive 45 minutes of therapy if they are seeing another healthcare professional at the time of their therapy session                               | Disagree – 10%<br>Ambiguous – 40%<br>Agree – 50%       |                          |
|                                                                                   | 3            | In the hyperacute/acute setting, a stroke survivor may not receive 45 minutes of therapy if they are seeing another healthcare professional at the time of their therapy session and I am unable to reschedule | Disagree – 0%<br>Ambiguous – 26.3%<br>Agree – 73.7%    |                          |
| <b>20. Inexperienced/newly qualified staff</b>                                    | 2            | Inexperienced or newly qualified staff find it more challenging to deliver the recommended minimum of 45 minutes, 5 days-a-week                                                                                | Disagree – 18.5%<br>Ambiguous – 37%<br>Agree – 44.5%   | Unable to gain consensus |
|                                                                                   | 3            | A stroke survivor may not receive 45 minutes of daily therapy if their therapist is newly qualified and/or inexperienced                                                                                       | Disagree - 46.2%<br>Ambiguous – 30.8%<br>Agree – 23.1% |                          |
| <b>21. MDT communication in the community</b>                                     | 2            | In the community (including ESD), lack of effective communication amongst the wider MDT can make delivery of 45 minutes of therapy a challenge                                                                 | Disagree – 18.8%<br>Ambiguous – 43.8%<br>Agree – 37.5% | Unable to gain consensus |
|                                                                                   | 3            | In ESD/Community Services lack of effective co-ordination between community services (e.g. carers, GP, District Nurse, any                                                                                     | Disagree - 28.6%<br>Ambiguous – 21.4%<br>Agree – 50%   |                          |

| Concept                                                                                                        | Delphi round | Statement                                                                                                                                                               | Result                                                 | Reason removed           |
|----------------------------------------------------------------------------------------------------------------|--------------|-------------------------------------------------------------------------------------------------------------------------------------------------------------------------|--------------------------------------------------------|--------------------------|
|                                                                                                                |              | other services involved) may mean stroke survivors do not receive 45 minutes of therapy                                                                                 |                                                        |                          |
| <b>22. Pressure to achieve the guideline</b>                                                                   | 1            | I feel pressure to achieve a minimum of 45 minutes of therapy for all stroke survivors on my caseload                                                                   | Disagree – 20%<br>Ambiguous – 45.7%<br>Agree – 34.3%   | Unable to gain consensus |
| <b>23. Not wanting more than one ESD visit per-day</b>                                                         | 1            | Stroke survivors receiving ESD input don't want more than one session of therapy-a-day when they are at home                                                            | Disagree – 39.1%<br>Ambiguous – 34.8%<br>Agree – 26.1% | Unable to gain consensus |
| <b>24. Likelihood of receiving more than one session per-day in ESD</b>                                        | 1            | Stroke survivors receiving Early Supported Discharge (ESD) input are unlikely to receive more than one session of therapy-a-day when they are at home                   | Disagree – 29.2%<br>Ambiguous – 12.5%<br>Agree – 58.3% | Unable to gain consensus |
|                                                                                                                | 2            | Stroke survivors receiving ESD support are unlikely to receive more than one therapy session per day at home (i.e. only one visit per-day from the ESD service)         | Disagree – 37.5%<br>Ambiguous – 18.8%<br>Agree – 43.8% |                          |
| <b>25. Appropriateness of the guideline for ESD</b>                                                            | 1            | The guideline for 45 minutes of therapy is not appropriate for stroke survivors receiving ESD (please consider justifying your answer in the comments below)            | Disagree – 58.3%<br>Ambiguous – 25%<br>Agree – 16.7%   | Unable to gain consensus |
|                                                                                                                | 2            | The guideline for 45 minutes of therapy is appropriate for most stroke survivors receiving ESD                                                                          | Disagree – 16.7%<br>Ambiguous – 11.1%<br>Agree – 72.2% |                          |
| <b>26. Difficult to return to people in the inpatient setting (if they don't receive 45 mins in a 'block')</b> | 1            | Logistically, it is difficult to return to a stroke survivor for a second time in a day, if they are unable to tolerate 45 minutes of therapy in one session            | Disagree – 14.3%<br>Ambiguous – 48.6%<br>Agree – 37.1% | Unable to gain consensus |
|                                                                                                                | 2            | In an inpatient setting, it is difficult to return to a stroke survivor for a second time in a day, if they are unable to tolerate 45 minutes of therapy in one session | Disagree – 36%<br>Ambiguous – 12%<br>Agree – 52%       |                          |

| Concept                                                                             | Delphi round | Statement                                                                                                                                            | Result                                                 | Reason removed           |
|-------------------------------------------------------------------------------------|--------------|------------------------------------------------------------------------------------------------------------------------------------------------------|--------------------------------------------------------|--------------------------|
| <b>27. Effect of therapy space/equipment</b>                                        | 2            | My ability to provide 45 minutes of therapy can be limited by inadequate therapy space and/or equipment                                              | Disagree – 35.7%<br>Ambiguous – 28.6%<br>Agree – 35.7% | Unable to gain consensus |
| <b>28. The influence of the guidance on therapy delivery (organisational level)</b> | 1            | The achievement of a good SSNAP score for my organisation influences how therapy is provided to stroke survivors                                     | Disagree – 15.6%<br>Ambiguous – 25%<br>Agree – 59.4%   | Unable to gain consensus |
|                                                                                     | 2            | The delivery of therapy within my organisation has changed in order to increase the achievement of the 45 minute guideline                           | Disagree – 28.6%<br>Ambiguous – 21.4%<br>Agree – 50%   |                          |
|                                                                                     | 3            | Since the publication of the guideline, my organisation has changed to improve achievement of 45 minutes therapy                                     | Disagree - 19.2%<br>Ambiguous – 15.4%<br>Agree – 65.4% |                          |
| <b>29. Sufficient funding to provide the recommended amount</b>                     | 2            | The service I work in is not appropriately funded to provide therapy for at least 45 minutes per day, five days per week                             | Disagree – 35.7%<br>Ambiguous – 14.3%<br>Agree – 50%   | Unable to gain consensus |
|                                                                                     | 3            | The service I work in is not sufficiently well-funded to provide therapy for at least 45 minutes per day, seven days per week                        | Disagree - 23.1%<br>Ambiguous – 15.4%<br>Agree – 61.5% |                          |
| <b>30. Effect of being discharged on SSNAP</b>                                      | 1            | If a stroke survivor is discharged from therapy on SSNAP, then they won't receive 45 minutes of daily therapy                                        | Disagree – 28.1%<br>Ambiguous – 28.1%<br>Agree – 43.8% | Unable to gain consensus |
| <b>31. Alternative if unable to provide 45 minutes (1)</b>                          | 1            | When I am unable to provide a minimum of 45 minutes of daily therapy, the best alternative is to provide daily therapy at a lesser number of minutes | Disagree – 14.3%<br>Ambiguous – 34.3%<br>Agree – 51.4% | Unable to gain consensus |

| Concept                                                                        | Delphi round | Statement                                                                                                                                    | Result                                                 | Reason removed           |
|--------------------------------------------------------------------------------|--------------|----------------------------------------------------------------------------------------------------------------------------------------------|--------------------------------------------------------|--------------------------|
| <b>32. Alternative if unable to provide 45 minutes (2)</b>                     | 1            | When I am unable to provide a minimum of 45 minutes of daily therapy, the best alternative is to provide 45 minutes of therapy on fewer days | Disagree – 20.6%<br>Ambiguous – 44.1%<br>Agree – 35.3% | Unable to gain consensus |
| <b>33. The influence of the guidance on therapy delivery (therapist level)</b> | 1            | The presence of the 45 minute guideline influences the amount of therapy I provide to stroke survivors                                       | Disagree – 17.1%<br>Ambiguous – 25.7%<br>Agree – 57.1% | Unable to gain consensus |
|                                                                                | 2            | I provide 45 minutes of therapy because the guideline says I should                                                                          | Disagree – 28.6%<br>Ambiguous – 42.9%<br>Agree – 28.6% |                          |
|                                                                                | 3            | The existence of the 45 minute guideline increases the amount of therapy I provide to stroke survivors                                       | Disagree - 15.4%<br>Ambiguous – 34.6%<br>Agree – 50%   |                          |
| <b>34. Providing 45 minutes of therapy 7 days-a-week</b>                       | 1            | Providing 45 minutes of therapy seven days a week is not appropriate for the majority of stroke survivors                                    | Disagree – 40%<br>Ambiguous – 48.6%<br>Agree – 11.4%   | Unable to gain consensus |
|                                                                                | 2            | Most stroke survivors would not want, tolerate or need 45 minutes of therapy, 7 days a week                                                  | Disagree – 46.4%<br>Ambiguous – 21.4%<br>Agree – 32.1% |                          |
|                                                                                | 3            | Most stroke survivors do not want, tolerate or need 45 minutes of therapy, 7 days a week                                                     | Disagree - 53.9%<br>Ambiguous – 26.9%<br>Agree – 19.2% |                          |
| <b>35. Delivering 45 minutes of therapy post-ESD</b>                           | 2            | It is unrealistic to deliver 45 minutes of therapy, 5 days a week in a community service (post-ESD)                                          | Disagree – 27.8%<br>Ambiguous – 16.7%<br>Agree – 55.6% | Unable to gain consensus |
|                                                                                | 3            | It is unrealistic to deliver 45 minutes of therapy, 7 days a week in a community service (post-ESD)                                          | Disagree - 31.3%<br>Ambiguous – 18.8%<br>Agree – 50%   |                          |



| Concept                                                                   | Delphi round | Statement                                                                                                                        | Result                                                 | Reason removed                                                            |
|---------------------------------------------------------------------------|--------------|----------------------------------------------------------------------------------------------------------------------------------|--------------------------------------------------------|---------------------------------------------------------------------------|
| <b>36. People who would benefit from 45 minutes receive it.</b>           | 1            | Stroke survivors who would benefit from more than 45 minutes of therapy-per-day, generally receive it                            | Disagree – 48.6%<br>Ambiguous – 14.3%<br>Agree – 37.1% | Unable to gain consensus                                                  |
|                                                                           | 3            | Stroke survivors who would benefit from more than 45 minutes of therapy-per-day, will receive it                                 | Disagree - 26.9%<br>Ambiguous – 46.2%<br>Agree – 26.9% |                                                                           |
| <b>37. Pressure to achieve the guideline, if not clinically indicated</b> | 1            | I feel pressure to provide all stroke survivors with a minimum of 45 minutes of therapy, even if it is not clinically indicated. | Disagree – 67.6%<br>Ambiguous – 32.4%<br>Agree – 0%    | Similar to statement about influence of the guideline on therapy delivery |

Please note: Some percentages do not add up to 100, due to rounding
